# Supplementary material for: First comparison of catalytic CO2 reduction to CO over molybdenum carbide, nitride and phosphide catalysts
Source: Royal Society of Chemistry journal article supplement (doi:10.1039/d3cy00979c), 2023-01-01
Supplement: d3cy00979c1.pdf [file d3cy00979c1.pdf]

## Supplementary Information

### First comparison of catalytic CO<sub>2</sub> reduction to CO over molybdenum carbide, nitride and phosphide catalysts

Qingshan Rong<sup>a,b</sup>, Wei Ding<sup>b</sup>, Guogang Liu<sup>c</sup>, Zhiqiang Zhang<sup>\*a</sup>, Zhiwei Yao<sup>\*a,b</sup>

<sup>a</sup>School of Chemical Engineering, University of Science and Technology Liaoning, Anshan, 114051, P.R. China; <sup>b</sup>School of Petrochemical Engineering, Liaoning Petrochemical University, Fushun, 113001, P.R. China; <sup>c</sup>PetroChina Fushun Petrochemical Company, Fushun, 113008, P.R. China.

Corresponding author:

Zhiqiang Zhang (E-mail: zhangzhiqiang@ustl.edu.cn)

Zhiwei Yao (E-mail: mezhiwei@163.com)

## 1. Experimental Section

### 1.1 Sample preparation

The carbon nanotubes (CNTs) used were multi-walled carbon nanotubes, purchased from Chengdu Organic Chemicals Co. Ltd. And more information regarding the CNTs was listed in Table S1. Firstly, the oxide precursors for molybdenum carbide, nitride and phosphide catalysts were prepared by impregnating CNTs with an aqueous solution of (NH<sub>4</sub>)<sub>6</sub>Mo<sub>7</sub>O<sub>24</sub>·4H<sub>2</sub>O and (NH<sub>4</sub>)<sub>2</sub>HPO<sub>4</sub> (only for phosphide) with a 60 wt% Mo loading and a 1:1 Mo:P molar ratio, followed by sonicating for about 30 min, and then dried in air at 80 °C for 4 h. Secondly, these precursors were heated from room temperature (RT) to

700 °C at a rate of 10 °C min<sup>-1</sup> under H<sub>2</sub> or NH<sub>3</sub> (150 ml min<sup>-1</sup>) and maintained at this temperature for 2 h, followed by cooling to RT, and then passivated in a 1%O<sub>2</sub>/Ar flow for 2 h. The resulting samples were denoted as carbonized Mo/CNTs, nitrified Mo/CNTs and phosphorized Mo/CNTs, respectively.

Table S1 The detailed information regarding the carbon nanotubes provided by the company.

| Index                                                   | Value                             |
|---------------------------------------------------------|-----------------------------------|
| Purity (wt%)                                            | >98                               |
| Inner diameter (nm)                                     | 5-15                              |
| Outer diameter (nm)                                     | >50                               |
| Length (μm)                                             | <10                               |
| Specific surface area (m <sup>2</sup> g <sup>-1</sup> ) | >60                               |
| Tap density (g cm <sup>-3</sup> )                       | 0.18                              |
| True density (g cm <sup>-3</sup> )                      | ~2.1                              |
| The content of metal impurity: Fe, Ni,                  | ≤200, ≤1000, ≤100, ≤100, <500,    |
| Co, Zn, Mg, Cu, Al, Ca, Cr, Mo, Mn,                     | <100, <100, <1000, <50, <50, <50, |
| Na (ppm)                                                | <500                              |

## 1.2 Sample characterization

X-ray diffraction (XRD) was carried out from 10 to 90 ° with a step-size of 0.2 ° and a counting time of 2 s using an X-ray diffractometer (X'Pert Pro MPD) equipped with a Cu Kα source. X-ray photoelectron spectroscopy (XPS) was carried out using a Kratos Axis ultra (DLD) equipped with Al Kα X-ray source. Samples were introduced directly, by a fast entry lock system, into the XPS analytical chamber. The binding energies (±0.2 eV) were referenced to the C 1s

peak at 284.8 eV due to adventitious carbon. The assignments of the peaks were carried out by using the values in the references reported in the text. The  $N_2$  adsorption-desorption isotherms were measured on a Nova 4200e instrument at -196 °C. Before the measurement, the sample was degassed at 300 °C for 6 h under vacuum. The specific surface area was calculated by a multipoint Braunauer-Emmett-Teller method. The morphologies of the samples were characterized by transmission electron microscopy (TEM, Philips Tecna 10). The samples for TEM observations were prepared by dispersing a dry powder on a lacey-carbon coated 200 mesh Cu TEM grids. CO-temperature programmed desorption (CO-TPD) experiments were carried out in a quartz tube micro-reactor. Prior to the CO-TPD process, 0.1 g of catalyst was heated from RT to 700 °C in  $H_2$  or  $NH_3$  and maintained at this temperature for 30 min. After being cooled to RT in He flow, a stream of 10%CO/He was introduced into the system for 20 min. After CO adsorption, the gas flow was switched to He ( $30\text{ ml min}^{-1}$ ) to remove physically adsorbed CO on catalyst surface 30 min. Finally, the sample was heated from RT to 900 °C at a rate of  $10\text{ °C min}^{-1}$  in He ( $30\text{ ml min}^{-1}$ ), and then was held at 900 °C for 30 min. The effluent gases were monitored by means of a GC thermal conductivity detector.

### 1.3 Catalytic performance tests

Catalytic activities of catalyst for RWGS were evaluated in a micro-reactor with an inner diameter of 8 mm at atmospheric pressure. Prior to the reaction, the sample was preheated in  $H_2$  or  $NH_3$  at 700 °C for 30 min. Following the

pretreatment, a gas mixture ( $H_2:CO_2=2:1$ ) was allowed to pass through the catalyst. The gas-phase products were analyzed by on-line GC. The conversion of  $CO_2$  and the selectivities of  $CO$  and  $CH_4$  were defined as follows:

$$CO_2 \text{ conversion (\%)} = ([CO_2]_{in} - [CO_2]_{out}) / ([CO_2]_{in}) \times 100$$

$$CO \text{ selectivity (\%)} = ([CO]_{out}) / ([CO]_{out} + [CH_4]_{out}) \times 100$$

$$CH_4 \text{ selectivity (\%)} = ([CH_4]_{out}) / ([CO]_{out} + [CH_4]_{out}) \times 100$$

## 2. Results

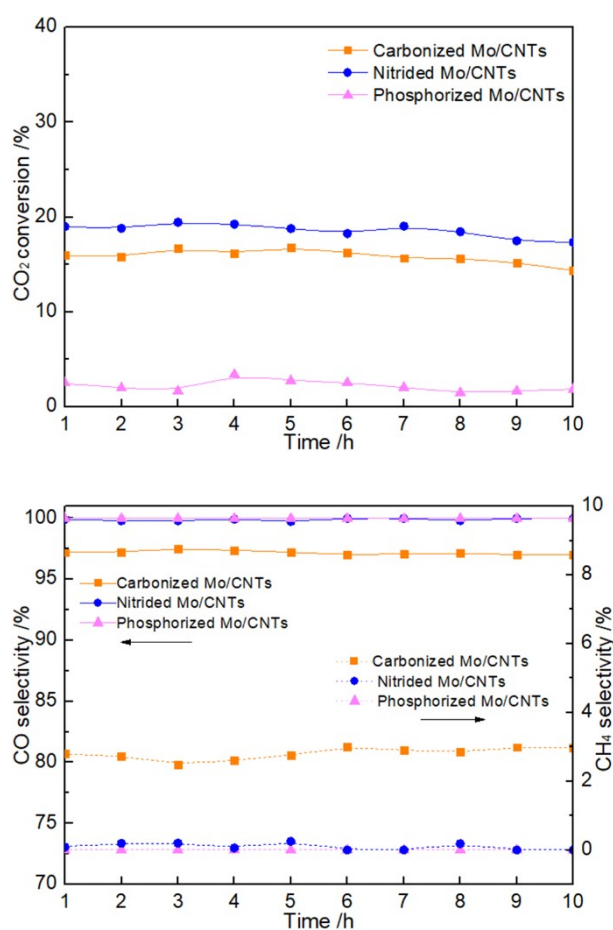

Fig. S1 The catalytic stability of carbonized, nitrided and phosphorized Mo/CNTs in the RWGS reaction ( $CO_2/H_2=1/2$ ,  $WHSV=36000 \text{ cm}^3 \text{ g}^{-1} \text{ h}^{-1}$ ,  $P=1 \text{ atm}$ ,  $T=350 \text{ }^\circ\text{C}$ ).

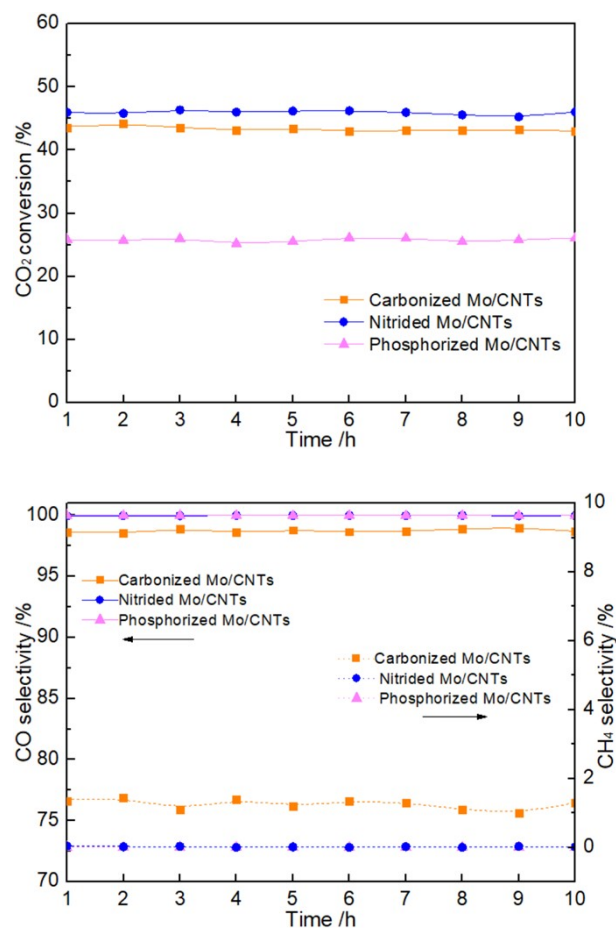

Fig. S2 The catalytic stability of carbonized, nitrided and phosphorized Mo/CNTs in the RWGS reaction ( $\text{CO}_2/\text{H}_2=1/2$ ,  $\text{WHSV}=36000 \text{ cm}^3 \text{ g}^{-1} \text{ h}^{-1}$ ,  $P=1 \text{ atm}$ ,  $T=550 \text{ }^\circ\text{C}$ ).

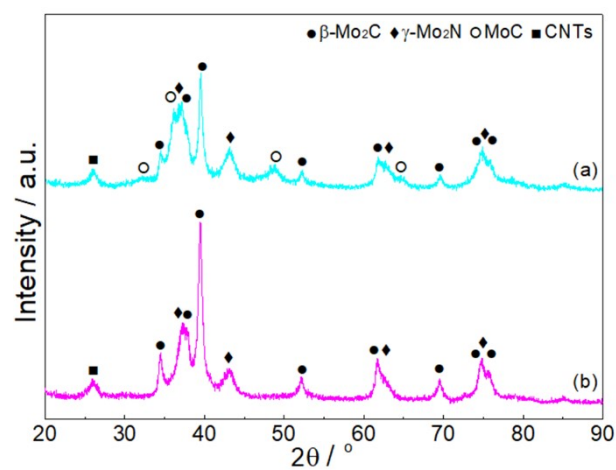

Fig. S3 XRD patterns of (a) used nitrided Mo/CNTs in the RWGS reaction ( $\text{CO}_2/\text{H}_2=1/2$ ,  $\text{WHSV}=300000 \text{ cm}^3 \text{ g}^{-1} \text{ h}^{-1}$ ,  $P=1 \text{ atm}$ ,  $T=600 \text{ }^\circ\text{C}$ ,  $t=1 \text{ h}$ ) as well as (b) fresh sample for comparison.

Table S2 Comparison of CO<sub>2</sub> conversion rate and CO selectivity for the nitrated Mo/CNTs and literature reported catalysts.

| Catalyst                          | H <sub>2</sub> :CO ratio | Temperature (°C) | WHSV (cm <sup>3</sup> g <sup>-1</sup> h <sup>-1</sup> ) | Rate (× 10 <sup>-5</sup> mol <sub>CO2</sub> g <sub>cat</sub> <sup>-1</sup> s <sup>-1</sup> ) | CO selectivity (%) | Reference |
|-----------------------------------|--------------------------|------------------|---------------------------------------------------------|----------------------------------------------------------------------------------------------|--------------------|-----------|
|                                   | 2:1                      | 300              | 300000                                                  | 4.1                                                                                          | 100                | this work |
| Nitrated Mo/CNTs                  | 2:1                      | 400              | 300000                                                  | 14                                                                                           | 100                | this work |
|                                   | 2:1                      | 500              | 300000                                                  | 34.4                                                                                         | 100                | this work |
|                                   | 2:1                      | 600              | 300000                                                  | 51.5                                                                                         | 100                | this work |
| Cu/β-Mo <sub>2</sub> C            | 2:1                      | 300              | 300000                                                  | 7.3                                                                                          | 96.5               | 23        |
|                                   | 2:1                      | 600              | 300000                                                  | 47.7                                                                                         | 99.2               | 23        |
| Co/β-Mo <sub>2</sub> C            | 2:1                      | 300              | 36000                                                   | 1.41                                                                                         | 98.1               | 30        |
| Cu-Zn-Al                          | 2:1                      | 500              | 300000                                                  | 26.1                                                                                         | 100                | 23        |
| Pt-Al <sub>2</sub> O <sub>3</sub> | 1.4:1                    | 400              | 12000                                                   | 0.16                                                                                         | N/A                | 46        |
| Pt-TiO <sub>2</sub>               | 1.4:1                    | 400              | 12000                                                   | 0.47                                                                                         | N/A                | 46        |
| Cu-Al <sub>2</sub> O <sub>3</sub> | 1:9                      | 500              | 12000                                                   | 0.9                                                                                          | 100                | 47        |
| Ni-CeO <sub>2</sub>               | 1:1                      | 400              | 120000                                                  | 6.69                                                                                         | 77                 | 48        |
